# Supplementary material for: Sequential Infiltration Synthesis into Maltoheptaose and Poly(styrene): Implications for Sub-10 nm Pattern Transfer
Source: MDPI journal article supplement (doi:10.3390/polym14040654), 2022-02-10
Supplement: s1 [file s1]

## Supporting Information

### Sequential Infiltration Synthesis into Maltoheptaose and Poly(styrene): Implications for Sub-10 nm Pattern Transfer

Löfstrand, A.<sup>1</sup>, Vorobiev, A.<sup>2</sup>, Mumtaz, M.<sup>3</sup>, Borsali, R.<sup>3</sup>, and Maximov, I.<sup>1</sup>.

<sup>1</sup> NanoLund and Solid State Physics, Lund University, SE-221 00 Lund, Sweden;

<sup>2</sup> Division for Materials Physics, Department of Physics and Astronomy, Uppsala University, SE-751 20 Uppsala, Sweden;

<sup>3</sup> Univ. Grenoble Alpes, CNRS, CERMAV, 38000 Grenoble, France.

This supporting information includes specular neutron reflectometry (NR) and analysis of a bare silicon substrate, as can be seen in Figure S1, and in Table S1, and of PS-OH when varying semi-static infiltration precursor exposure time, and temperature, respectively. It also includes scanning electron microscopy (SEM) images of PS-*b*-MH after TMA/H<sub>2</sub>O infiltration and PS removal, as well as images of 12 nm pitch features after pattern transfer into silicon using the resulting alumina-containing hybrid etch mask.

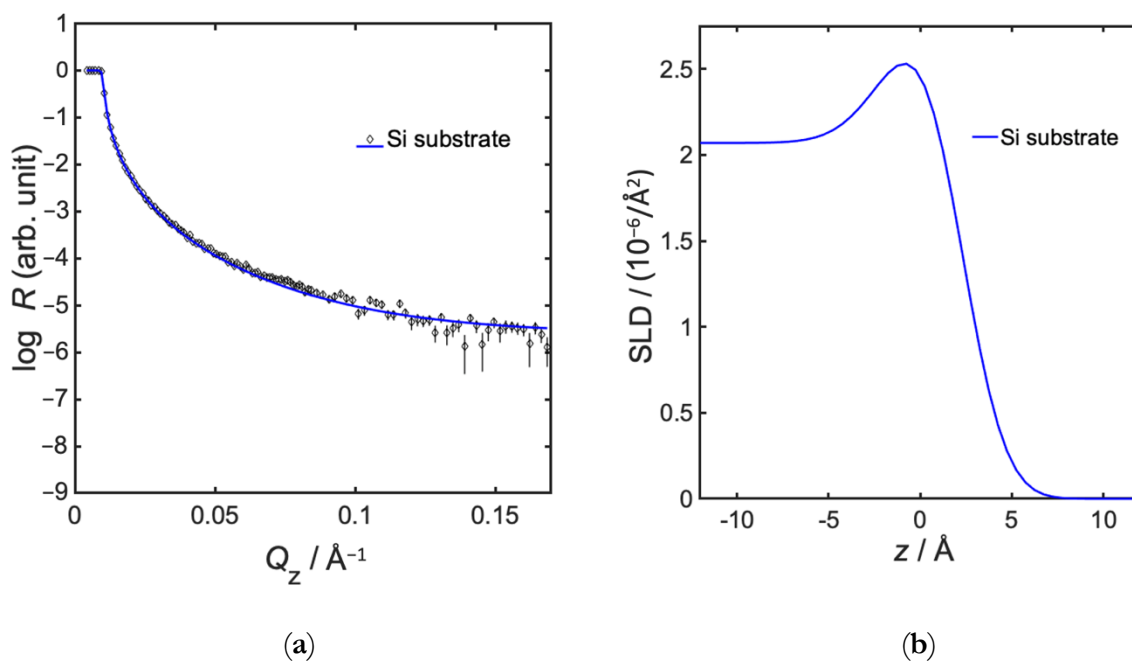

**Figure S1.** Neutron reflectometry data of bare silicon substrate. a) Neutron specular reflectivity profile, showing measured data with error bars, and fitted model as solid line, and b) fitted neutron SLD as a function of distance from substrate, where  $z=0$  represents the interface between silicon and native oxide.

The effect of precursor exposure time on two cycles of semi-static sequential infiltration synthesis (SIS) of hydroxyl-terminated poly(styrene) (PS-OH) is shown in Figure S2 and Table S1.

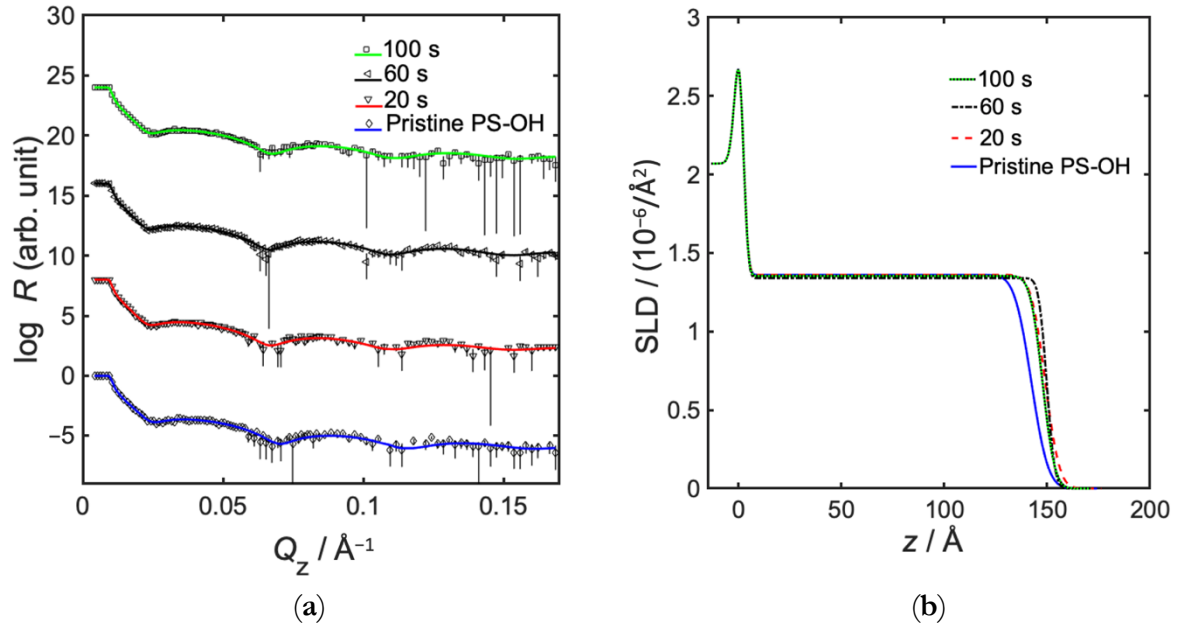

**Figure S2.** Neutron reflectometry data, showing effect of precursor exposure time in semi-static infiltration of TMA/H<sub>2</sub>O into PS-OH. a) Neutron specular reflectivity profiles, showing measured data with error bars, and fitted models as solid lines, and b) fitted neutron SLD as a function of distance from substrate, where  $z=0$  represents the interface between silicon and native oxide.

**Table S1.** Effect of precursor exposure time in semi-static infiltration of TMA/H<sub>2</sub>O into PS-OH.

| PS-OH                                                   | Pristine        |                 | Infiltrated     |                 |
|---------------------------------------------------------|-----------------|-----------------|-----------------|-----------------|
| Exposure time / s                                       | 0               | 20              | 60*             | 100             |
| Thickness top layer / $\text{\AA}$                      | $140 \pm 2$     | $147 \pm 2$     | $148 \pm 2$     | $146 \pm 2$     |
| SLD top layer/ $10^{-6} \text{\AA}^{-2}$                | $1.36 \pm 0.03$ | $1.36 \pm 0.03$ | $1.34 \pm 0.03$ | $1.36 \pm 0.03$ |
| Top roughness top layer / $\text{\AA}$                  | $6 \pm 4$       | $5 \pm 4$       | $3 \pm 3$       | $5 \pm 3$       |
| Included Al <sub>2</sub> O <sub>3</sub> / vol%          | 0               | 0               | 0               | 0               |
| Thickness native oxide layer / $\text{\AA}$             | 2               | 2               | 2               | 2               |
| SLD native oxide layer / $10^{-6} \text{\AA}^{-2}$      | 4.16            | 4.16            | 4.16            | 4.16            |
| Top roughness native oxide layer / $\text{\AA}$         | 2               | 2               | 2               | 2               |
| SLD silicon substrate layer / $10^{-6} \text{\AA}^{-2}$ | 2.07            | 2.07            | 2.07            | 2.07            |
| Top roughness silicon substrate layer / $\text{\AA}$    | 3               | 3               | 3               | 3               |

\* Reference sample.

The effect of temperature on two cycles of semi-static SIS of PS-OH is shown in Figure S3 and Table S2.

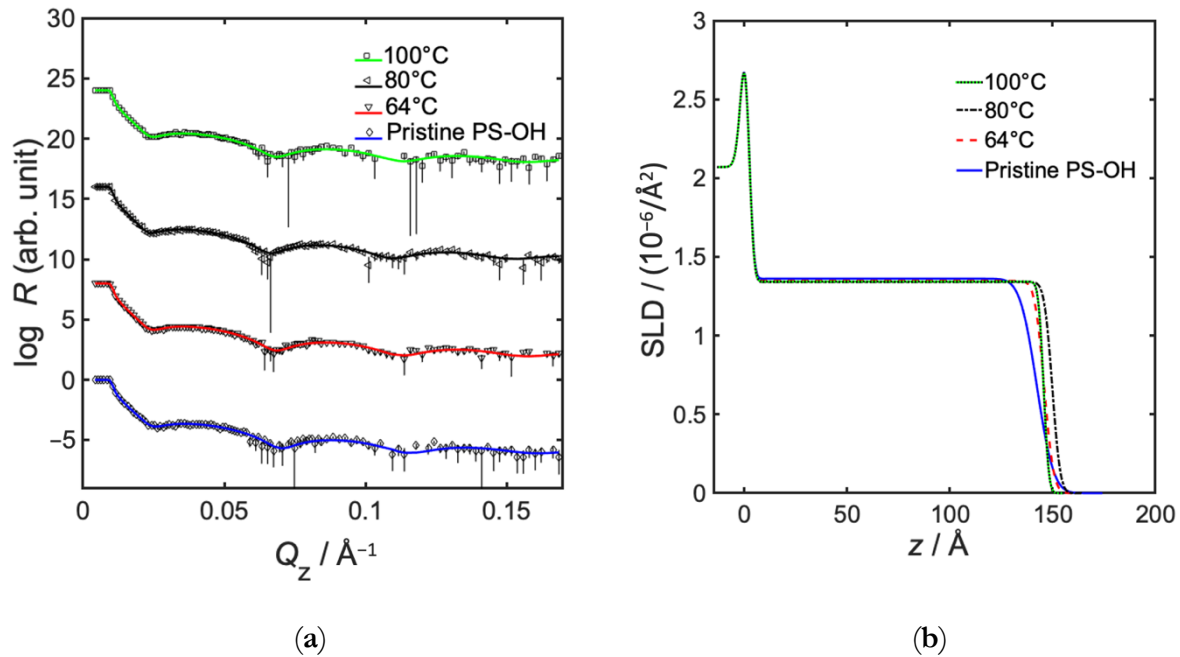

**Figure S3.** Neutron reflectometry data, showing effect of temperature in semi-static infiltration of TMA/H<sub>2</sub>O into PS-OH. a) Neutron specular reflectivity profiles, showing measured data with error bars, and fitted models as solid lines, and b) fitted neutron SLD as a function of distance from substrate, where  $z=0$  represents the interface between silicon and native oxide.

**Table S2.** Effect of temperature in semi-static infiltration of TMA/H<sub>2</sub>O into PS-OH.

| PS-OH                                                   | Pristine  |           | Infiltrated |           |
|---------------------------------------------------------|-----------|-----------|-------------|-----------|
| Temperature / °C                                        | -         | 64        | 80*         | 100       |
| Thickness top layer / Å                                 | 140±2     | 144±1     | 148±2       | 143±2     |
| SLD top layer/ $10^{-6} \text{\AA}^{-2}$                | 1.36±0.03 | 1.35±0.02 | 1.34±0.03   | 1.34±0.03 |
| Top roughness top layer / Å                             | 6±4       | 4±3       | 3±3         | 2±(+4/-0) |
| Included Al <sub>2</sub> O <sub>3</sub> / vol%          | 0         | 0         | 0           | 0         |
| Thickness native oxide layer / Å                        | 2         | 2         | 2           | 2         |
| SLD native oxide layer / $10^{-6} \text{\AA}^{-2}$      | 4.16      | 4.16      | 4.16        | 4.16      |
| Top roughness native oxide layer / Å                    | 2         | 2         | 2           | 2         |
| SLD silicon substrate layer / $10^{-6} \text{\AA}^{-2}$ | 2.07      | 2.07      | 2.07        | 2.07      |
| Top roughness silicon substrate layer / Å               | 3         | 3         | 3           | 3         |

\* Reference sample.

Semi-static infiltration of TMA/H<sub>2</sub>O into an 11 nm layer of the block copolymer poly(styrene)-*block*-maltoheptaose (4.5k-*b*-1.2k) on top of a silicon substrate was investigated. First using the following deviations from the reference process: 20 s exposure time for 2, 4, and 8 cycles, respectively (see Figure S4a, b, and c). Then using the deviations 20 s exposure time, but also 75 ms/45 ms TMA/H<sub>2</sub>O pulses, for 2, 4, and 8 cycles, respectively (see Figure S4d, e, and f). SEM inspection was made after poly(styrene) removal in oxygen plasma reactive ion etching.

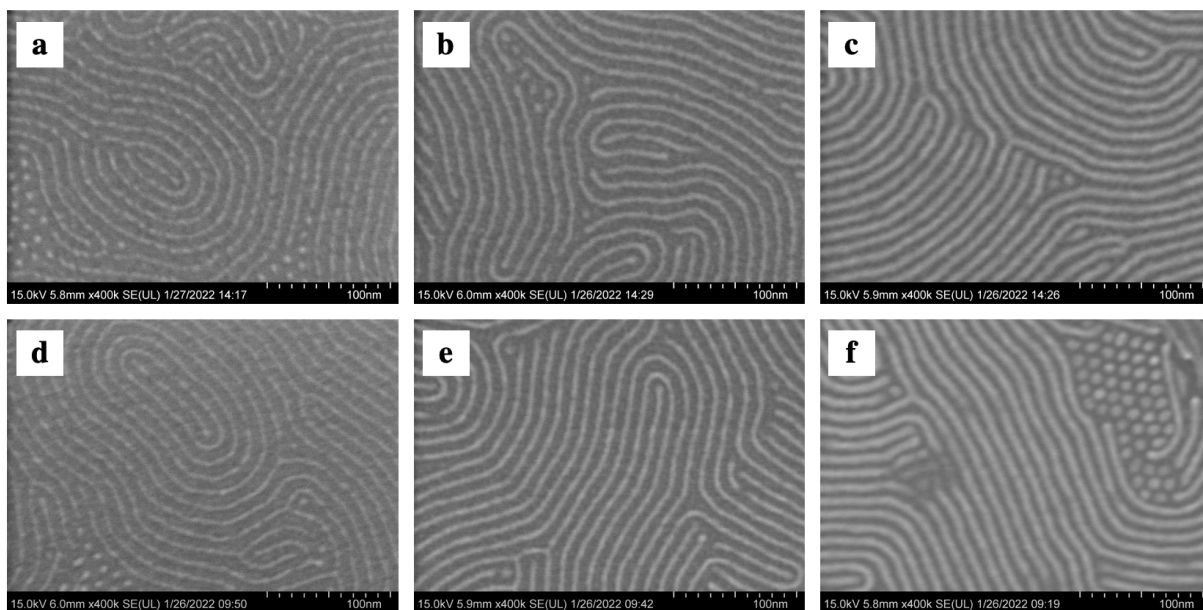

**Figure S4.** SEM top view images of semi-statically infiltrated PS-*b*-MH after poly(styrene) removal. Upper row using 20 s exposure and 25 ms/15 ms TMA/H<sub>2</sub>O pulses: a) 2 cycles, b) 4 cycles, and c) 8 cycles. Lower row using 20 s exposure and 75 ms/45 ms TMA/H<sub>2</sub>O pulses: d) 2 cycles, e) 4 cycles, and f) 8 cycles. Some images were adjusted in brightness and contrast to facilitate comparison.

Figure S5 displays the raw data of the images of etch mask and etched features shown in Figure 6 in the article.

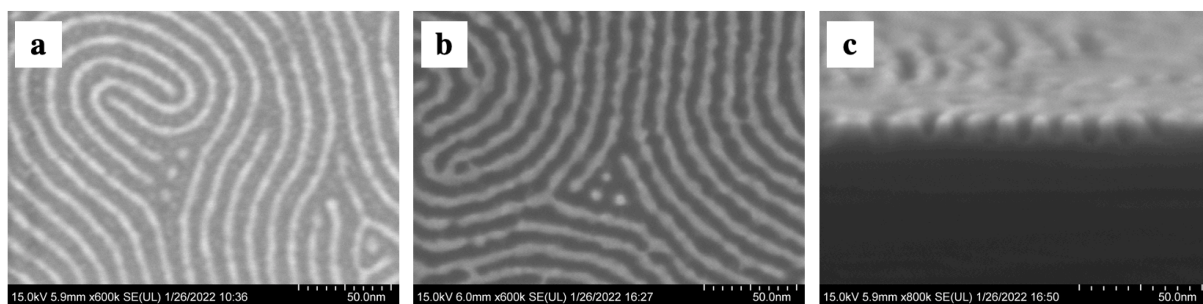

**Figure S5.** SEM images, a) top view of semi-statically infiltrated PS-*b*-MH using 4 cycles of 20 s exposure and 75 ms/45 ms TMA/H<sub>2</sub>O pulses, as well as poly(styrene) removal, b) top view of features etched into silicon using fluoro-based plasma, and c) cross-sectional view of the same.
